# Supplementary material for: Antimicrobial and Antioxidant Potential of Scenedesmus obliquus Microalgae in the Context of Integral Biorefinery Concept
Source: MDPI journal article supplement (doi:10.3390/molecules27020519), 2022-01-14
Supplement: s1 [file s1]

## Supplemental material

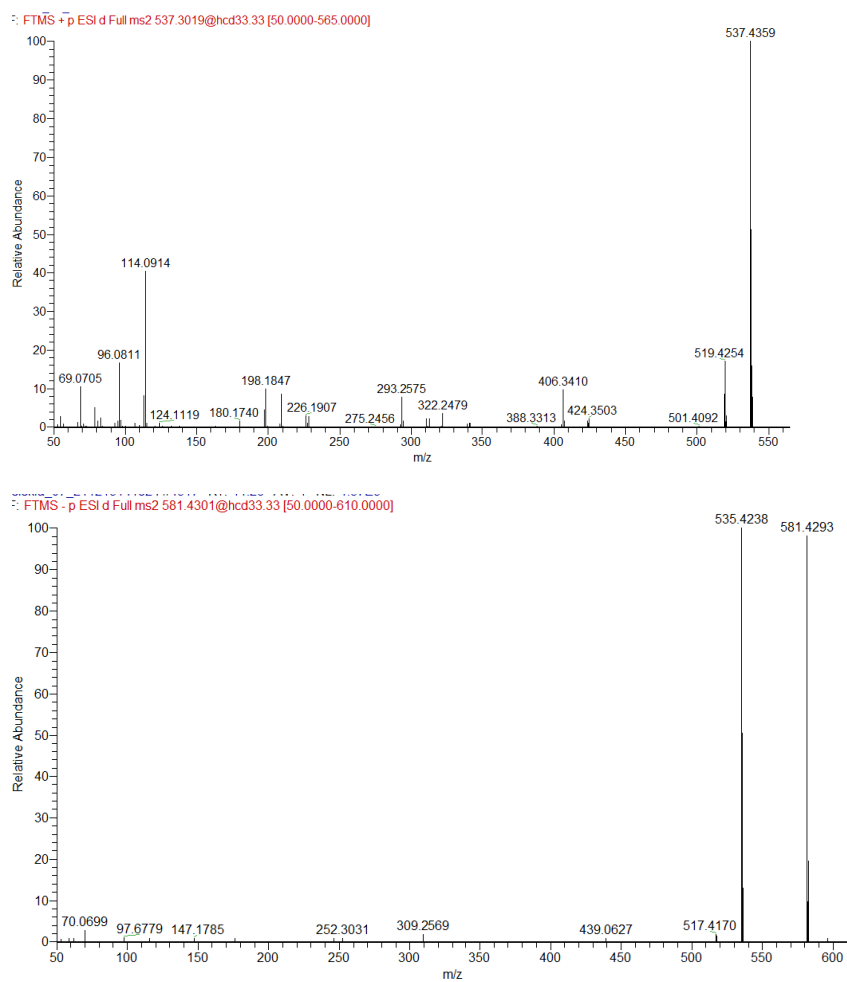

**Figure S1.** (+) ESI-MS/MS (up) and (-) ESI-MS/MS (down) spectra of carotene (**1**).

F: FTMS + p ESI Full ms [100.0000-1000.0000]

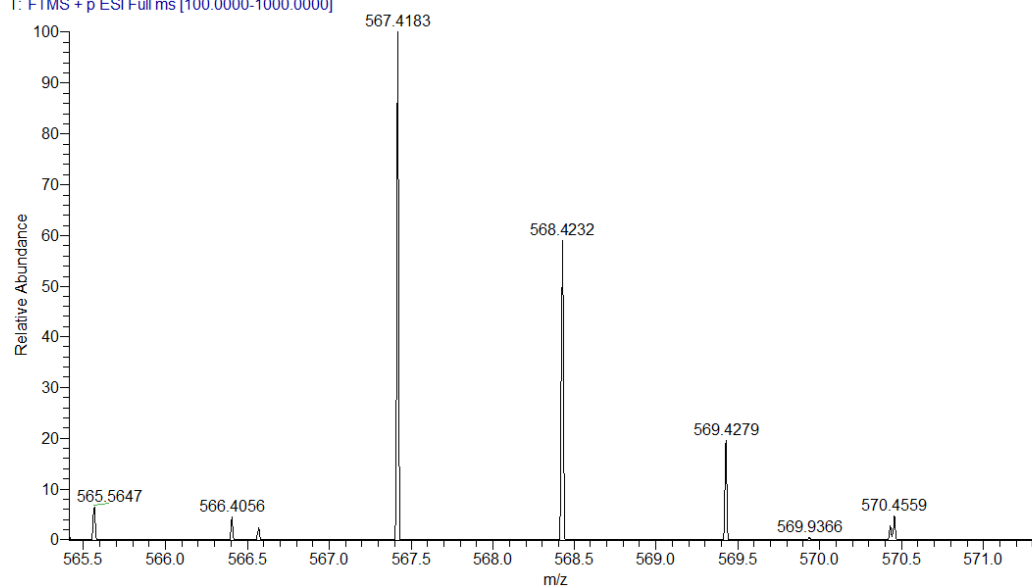

telekia\_07\_211215131343 #10663 RT: 22.91 AV: 1 NL: 3.95E4  
F: FTMS + p ESI d Full ms2 567.4182@hcd33.33 [50.0000-595.0000]

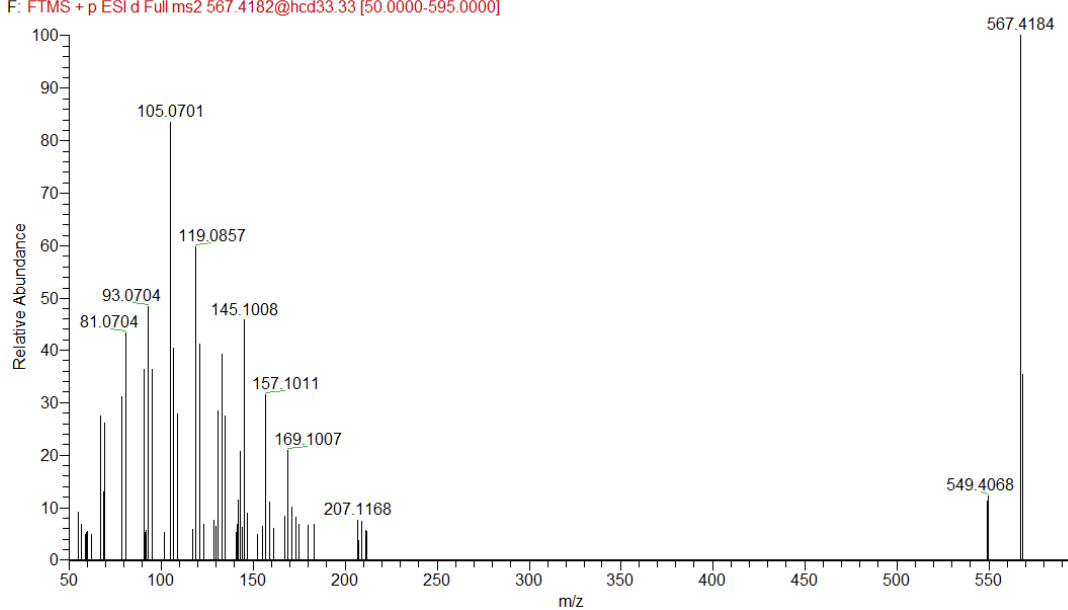

**Figure S2.** Monoisotopic profile of hydroxyechineone (**3**) in Full MS spectrum (up); (+) ESI-MS/MS spectrum (down).

elekia\_07\_211215131343-2 #10521 RT: 22.61 AV: 1 NL: 3.04E5  
 F: FTMS + p ESI Full ms [100.0000-1000.0000]

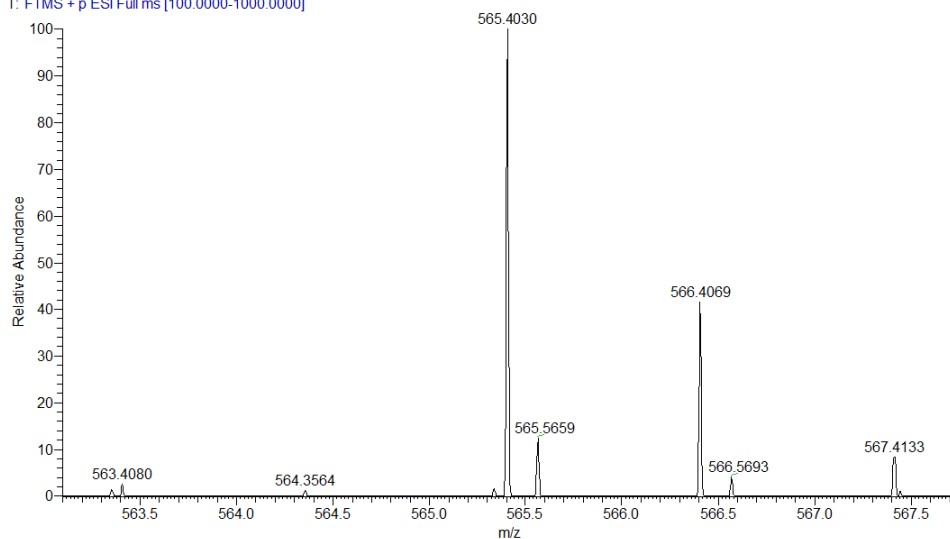

**Figure S3.** Monoisotopic profile of canthaxanthine (**2**) in Full MS spectrum.

F: FTMS - p ESI d Full ms2 275.2020@hcd33.33 [50.0000-300.0000]

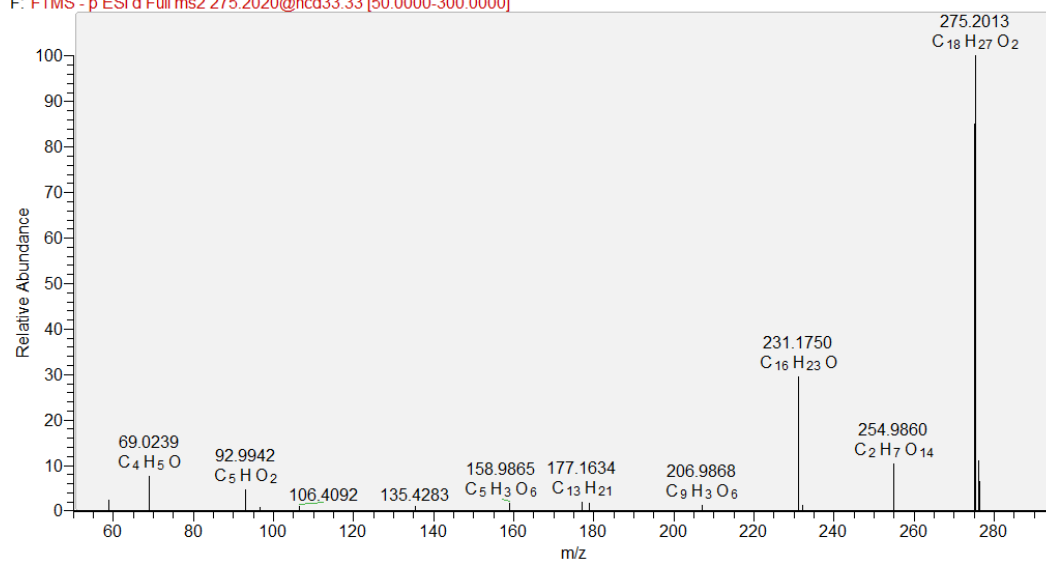

**Figure S4.** (-) ESI-MS/MS spectrum of octadecatetraenoic acid (**10**).

F: FTMS - p ESI d Full ms2 293.1403@hcd33.33 [50.0000-320.0000]

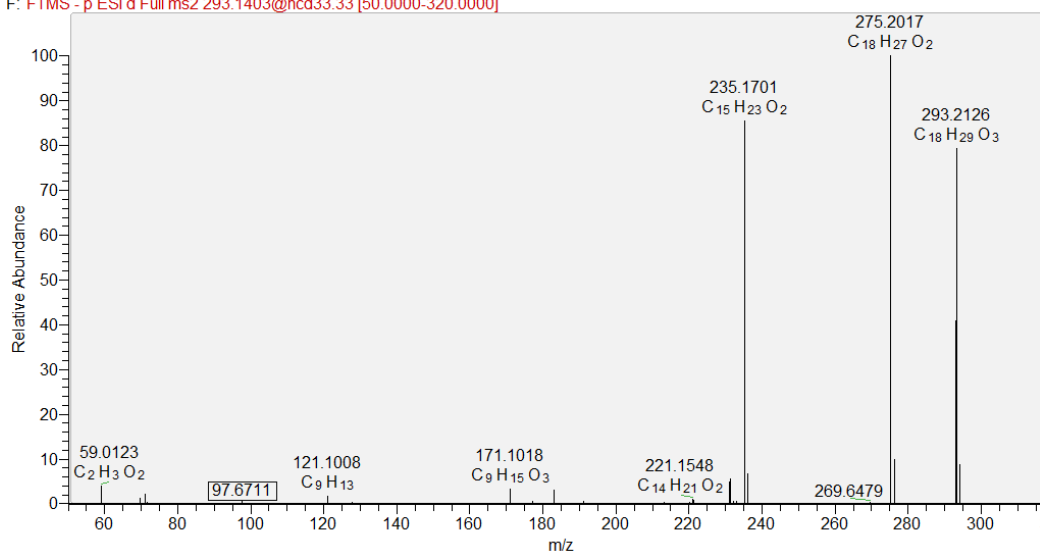

**Figure S5.** (-) ESI-MS/MS spectrum of hydroxyoctadecatrienoic (**12**).

F: FTMS - p ESI d Full ms2 305.1767@hcd33.33 [50.0000-330.0000]

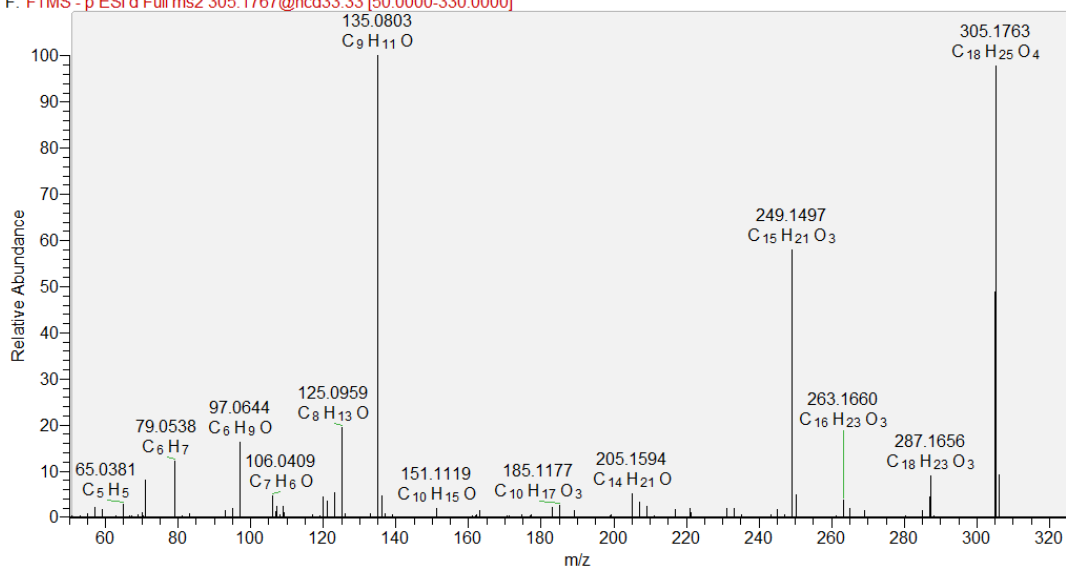

**Figure S6.** (-) ESI-MS/MS spectrum of dihydroxyoctadecapentaenoic acid (**14**).

F: FTMS - p ESI d Full ms2 323.0143@hcd33.33 [50.0000-350.0000]

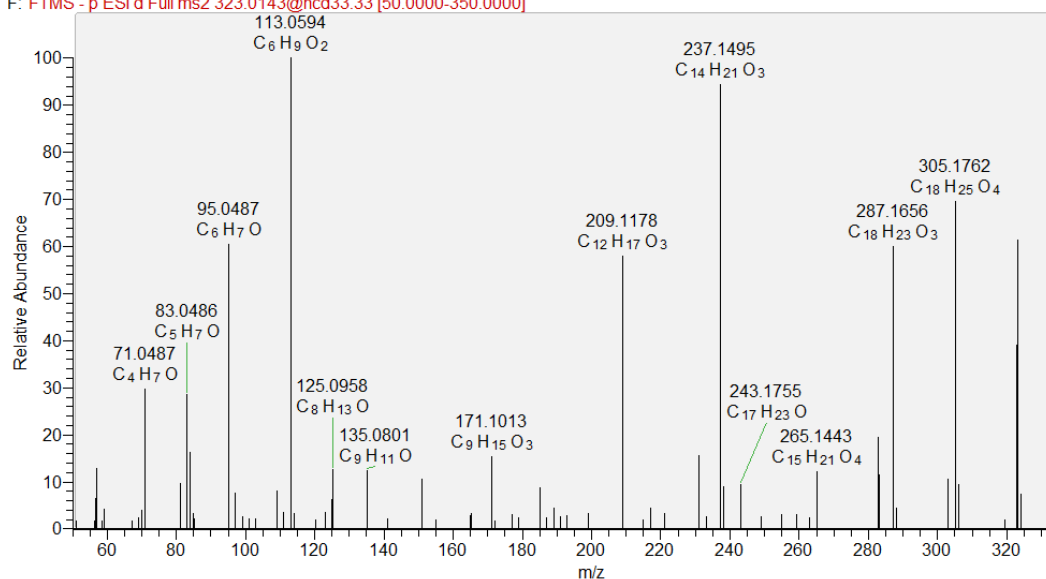

**Figure S7. (-) ESI-MS/MS spectrum of trihydroxyoctadecatetraenoic acid (18).**

F: FTMS - p ESI d Full ms2 263.1657@hcd33.33 [50.0000-285.0000]

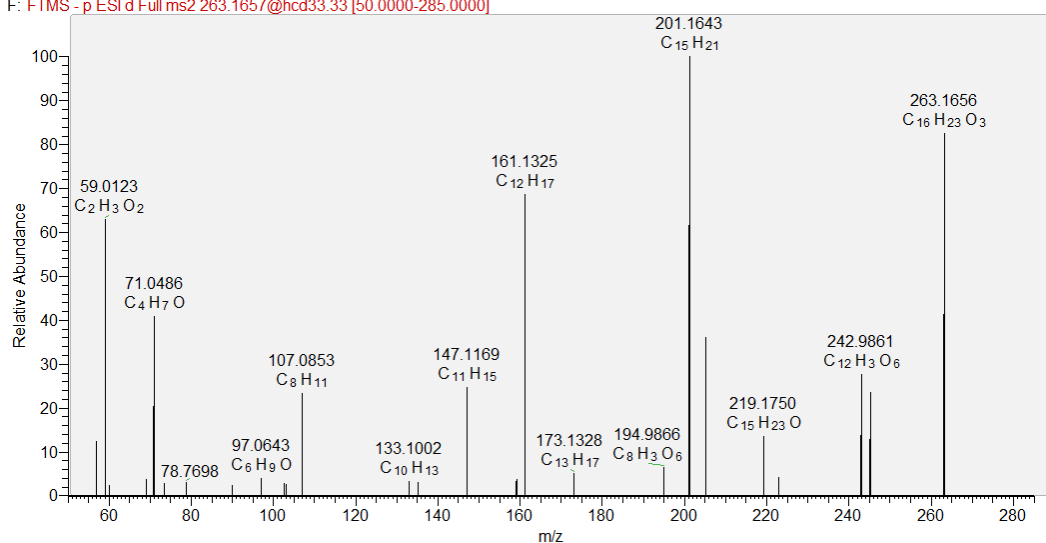

**Figure S8. (-) ESI-MS/MS spectrum of hydroxyhexadecatetraenoic acid (6).**
